# Supplementary material for: Third Harmonic Generation in Thin NbOI2 and TaOI2
Source: MDPI journal article supplement (doi:10.3390/nano14050412), 2024-02-23
Supplement: s1 [file s1]

# Third Harmonic Generation in Thin NbOI<sub>2</sub> and TaOI<sub>2</sub>

Tianhong Tang <sup>1,2</sup>, Deng Hu <sup>1,2</sup>, Di Lin <sup>1,2</sup>, Liu Yang <sup>1,2</sup>, Ziling Shen <sup>1,2</sup>, Wenchen Yang <sup>1,2</sup>, Haiyang Liu <sup>1,2</sup>,  
Hanting Li <sup>1,2</sup>, Xiaoyue Fan <sup>1,2</sup>, Zhiwei Wang <sup>1,2,\*</sup> and Gang Wang <sup>1,2,\*</sup>

<sup>1</sup> Centre for Quantum Physics, Key Laboratory of Advanced Optoelectronic Quantum Architecture and Measurement (MOE), School of Physics, Beijing Institute of Technology, Beijing 100081, China

<sup>2</sup> Beijing Key Lab of Nanophotonics and Ultrafine Optoelectronic Systems, Beijing Institute of Technology, Beijing 100081, China

\* Correspondence: zhiweiwang@bit.edu.cn (Z.W.); gw@bit.edu.cn (G.W.)

## Experimental setup

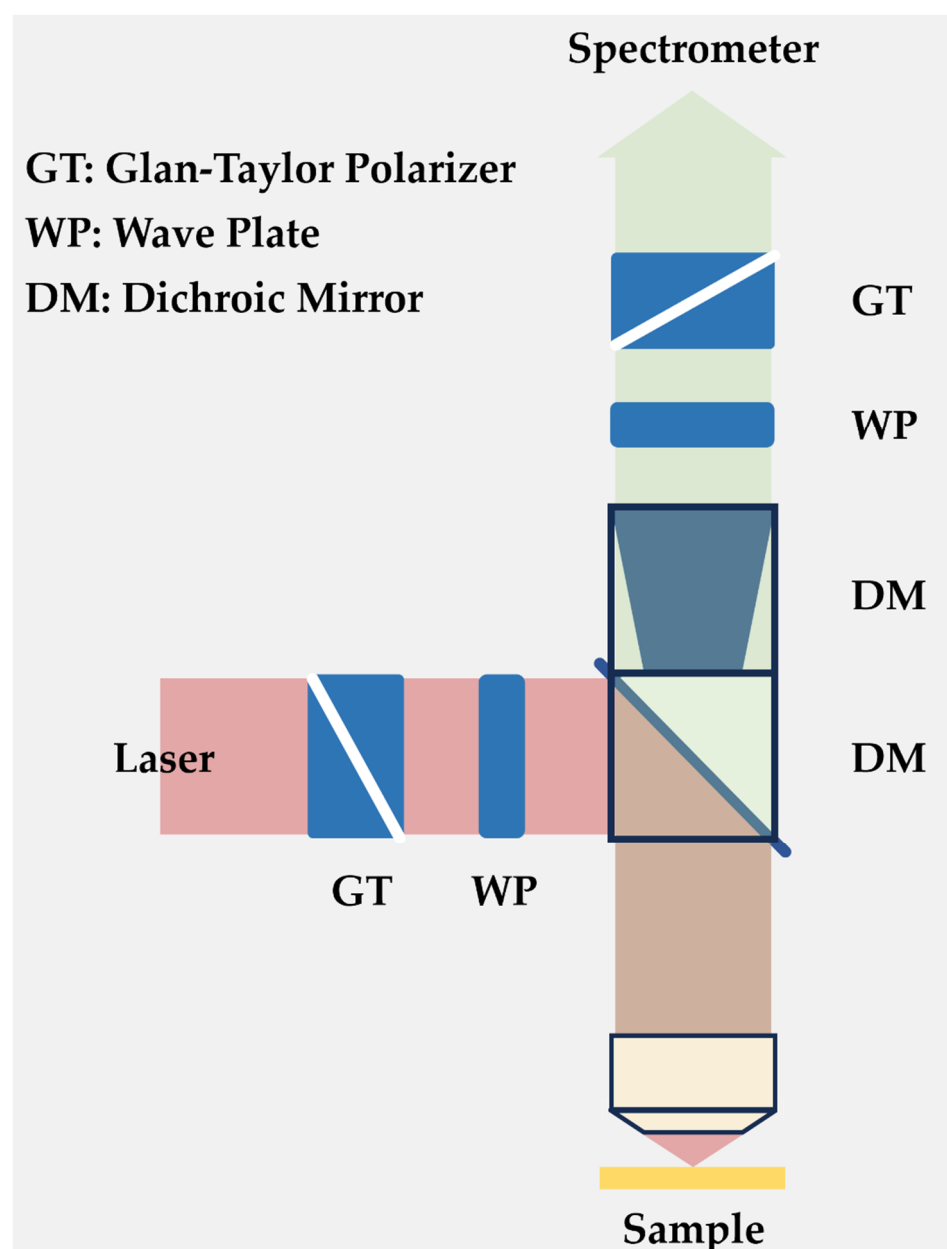

**Citation:** Tang, T.; Hu, D.; Lin, D.; Yang, L.; Shen, Z.; Yang, W.; Liu, H.; Li, H.; Fan, X.; Wang, Z.; et al. Third Harmonic Generation in Thin NbOI<sub>2</sub> and TaOI<sub>2</sub>. *Nanomaterials* **2024**, *14*, 412. <https://doi.org/10.3390/nano14050412>

Academic Editor: Alexander Tselev

Received: 31 January 2024

Revised: 18 February 2024

Accepted: 21 February 2024

Published: 23 February 2024

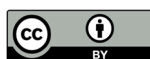

**Copyright:** © 2024 by the authors. Licensee MDPI, Basel, Switzerland. This article is an open access article distributed under the terms and conditions of the Creative Commons Attribution (CC BY) license (<https://creativecommons.org/licenses/by/4.0/>).

**Figure S1.** Experimental setup for the THG and SHG measurement.

## XRD measurements

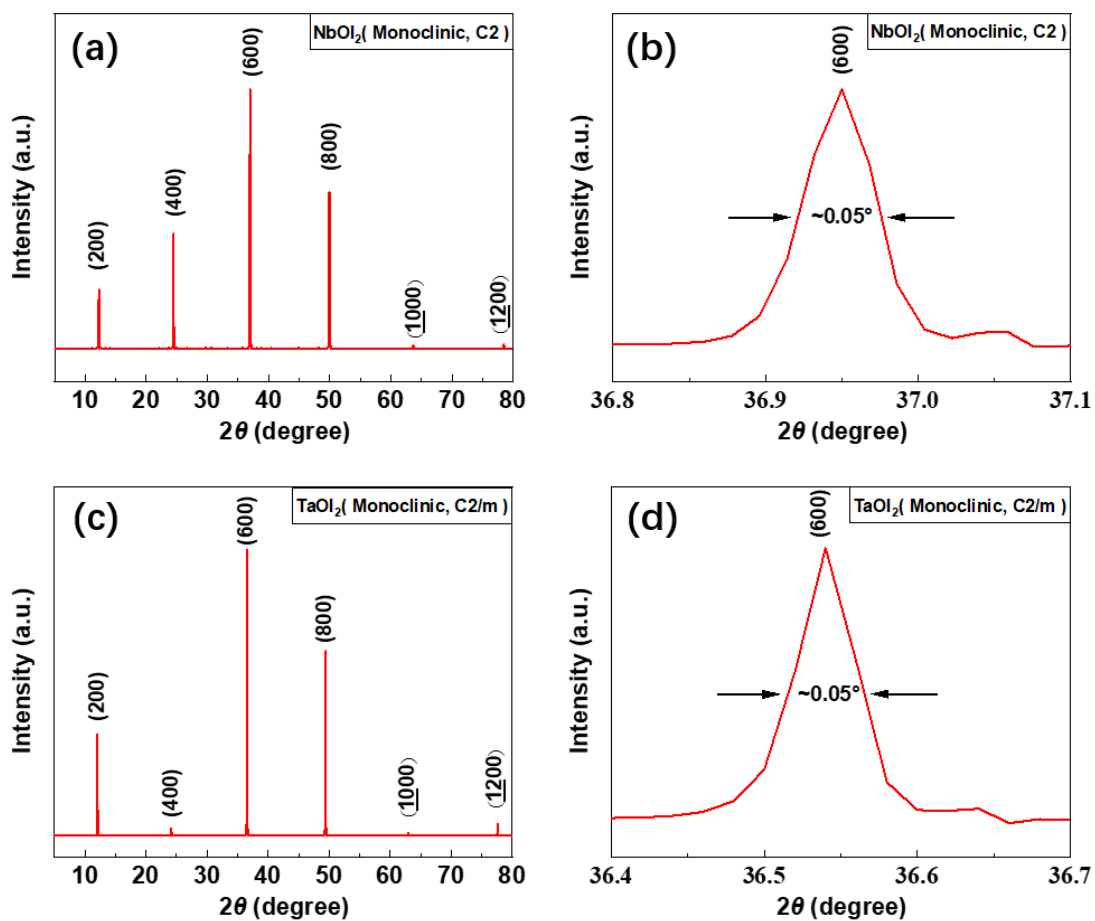

**Figure S2.** XRD of the synthesized NbOI<sub>2</sub> and TaOI<sub>2</sub> single crystal. (a). XRD pattern of as-grown NbOI<sub>2</sub> single crystal. (b). Enlarged view of the (600) peak in figure S1a shows, the FWHM is only 0.05°. (c). XRD pattern of as-grown TaOI<sub>2</sub> single crystal. (d). Enlarged view of the (600) peak in figure S2c, the FWHM is only 0.05°.

**Disclaimer/Publisher's Note:** The statements, opinions and data contained in all publications are solely those of the individual author(s) and contributor(s) and not of MDPI and/or the editor(s). MDPI and/or the editor(s) disclaim responsibility for any injury to people or property resulting from any ideas, methods, instructions or products referred to in the content.
